# Supplementary material for: Increased mutation efficiency of CRISPR/Cas9 genome editing in banana by optimized construct
Source: PeerJ. 2022 Jan 5;10:e12664. doi: 10.7717/peerj.12664 (PMC8742547; doi:10.7717/peerj.12664)
Supplement: Supplemental Information 2 — U6 promoters used in this study [file peerj-10-12664-s002.xlsx]

## Sheet: Sheet1
Supplementary table 2 U6 promoters used in this study
gene	sequence
MaU6a	GGGATCCACTAGTACAACGCCGAGTAGGATGGCGCATTTCCTGTAGACGAGCACCGACCGACCCATACGGGTTTTGATCGTGCGACGCCATTCAGAACTTTCTGAAATGGATCCGTAGTGTTCAGCGCCGACTTGTACGGTGCCGAACAACGTGAAGGACGTATGGTCGCCTACGTGGATAATGCTAAAATGAGTCATATCTTATATTCGACAATGATTAACTAGGTTGCACGTAGTTGACGCGATAAATGAATAAAAAGGATCCCAATTCCACTTTAACAATGCTTTTGCCATCATCAAACAGCGGAAGACAAAAGGACTTTTGTTTTTGTTTTCCTTTGGAAGCATCATCACAGTTCCGGTGGCTCCATCCAGGTGCGAAATCTCATATGGCAAATT…
MaU6b	TATTGGGTGCTATTACACAGTTTGTTCTATGCTTTAGCAGTGCTATTACACAGTTTTGAAGAATAGAAAAAAATATTGCGAATGACTGTTTTATTGAAGTTGCATTTATTTTTGTTTTCTGCTTGCACCTTTGATCTGGGTCCCAGATCGTAGATGGTTGGTCAATTCATTTCAGTACATGCCTAACAAATTCTGAAGTTAAAGCTGTTCAAAGTGTTGCCCGAATCATCCATTGTTATTGCATGTCTTAAGTAGGCCGTGATGCCTCCTCTTTCATAACTTGCGCTTCAATTCGACAATACTAGTTCATCTGTTTGTGGATCATAGGGCATCACACATTTATCAGGAAGGAAACTATGCTTTGCATTGGTTAGCTAATTTTGGTGGAATCAATCATTT…
MaU6c	TATTTGTTGCCTTGGGTTGTGTCAAGAAAAATTGACTTCCTTGCTTTACAACTATAACTAGATTGTTCAGGAGACAATTTTTGACTAGCCAATTGATCATGCTAAATTATCTTATTATTGGACATGCTTTTTTGTGTTTAATAGTATTGCTTTAGTGCATGAACCAGTTAATCATCTATTCTTGATTTTGTTTTATTCTATAGGACAACCAATTATTTTATTCTCTCTAATTTTTTTTTTACGAGCTTTAAGAATAAAATTGGCACATTCTTTTGGTATCTTAACTGTTTCTTCTTTTTCTTATACTAACTTTATGATAGCTAATTAATTATCTAACTGGTCTACTAGTTTATTGAAACTAGTCACAGTAACTTTGTTTTACTAGCCGCAAAAATGATG…
MaU6c-300	TTTTTTCCTGTAGTTTTCCCACAACCATTTTTTACCATCCGAATGATAGGATAGGAAAAATATCCAAGTGAACAGTATTCCTATAAAATTCCCGTAAAAAGCCTGCAATCCGAATGAGCCCTGAAGTCTGAACTAGCCGGTCACCTGTACAGGCTATCGAGATGCCATACAAGAGACGGTAGTAGGAACTAGGAAGACGATGGTTGATTCGTCAGGCGAAATCGTCGTCCTGCAGTCGCATCTATGGGCCTGGACGGAATAGGGGAAAAAGTTGGCCGGATAGGAGGGAAAGGCCCAGGTGCTTACGTGCGAGGTAGGCCTGGGCTCTCAGCACTTCGATTCGTTGGCACCGGGGTAGGATGCAATAGAGAGCAACGTTTAGTACCACCTCGCTTAGCT…
PDS-T1-gRNA	CATCTTTCTGCAATGGTCCAGTTTTAGAGCTAGAAATAGCAAGTTAAAATAAGGCTAGTCCGTTATCAACTTGAAAAAGTGGCACCGAGTCGGTGCTTTTTTT
PDS2-T2-gRNA	ACTTCATCATTGACTCGGTCGTTTTAGAGCTAGAAATAGCAAGTTAAAATAAGGCTAGTCCGTTATCAACTTGAAAAAGTGGCACCGAGTCGGTGCTTTTTTT
