# Supplementary material for: Increased mutation efficiency of CRISPR/Cas9 genome editing in banana by optimized construct
Source: PeerJ. 2022 Jan 5;10:e12664. doi: 10.7717/peerj.12664 (PMC8742547; doi:10.7717/peerj.12664)
Supplement: Supplemental Information 3 [file peerj-10-12664-s003.xlsx]

## Sheet: Sheet1
Supplementary table 1 Primers used in this study
Primer	Forward	Reverse
MaU6a-1600	CAGCCCGGGGGATCCACTAGTGAACAACACTACTTAGGCACTA	GGCGGCCGCTCTAGAACTAGTAACCTCATCGCCAACTCTG
MaU6b-1600	CAGCCCGGGGGATCCACTAGTCAGTTTGCCGTTGTGAGATG	GGCGGCCGCTCTAGAACTAGTAACCGCTTGCCTGATCATT
MaU6c-1600	CAGCCCGGGGGATCCACTAGTACATCATCTGTTTCAGCATTTG	GGCGGCCGCTCTAGAACTAGTAACAGCGTTACCGATCGACG
MaU6a-1000	CAGCCCGGGGGATCCACTAGTACAACGCCGAGTAGGATG	GGCGGCCGCTCTAGAACTAGTAACCTCATCGCCAACTCTG
MaU6a-700	CAGCCCGGGGGATCCACTAGTCATCAAACAGCGGAAGACAAA	GGCGGCCGCTCTAGAACTAGTAACCTCATCGCCAACTCTG
MaU6a-400	CAGCCCGGGGGATCCACTAGTGAATGAGTGTGCTGTGTTAGA	GGCGGCCGCTCTAGAACTAGTAACCTCATCGCCAACTCTG
MaU6a-300	CAGCCCGGGGGATCCACTAGTATGGGTTCGAGAATTGTACATGT	GGCGGCCGCTCTAGAACTAGTAACCTCATCGCCAACTCTG
MaU6b-1000	CAGCCCGGGGGATCCACTAGTATTGGGTGCTATTACACAGTTTG	GGCGGCCGCTCTAGAACTAGTAACCGCTTGCCTGATCATT
MaU6b-700	CAGCCCGGGGGATCCACTAGTTCATCTGTTTGTGGATCATAGGG	GGCGGCCGCTCTAGAACTAGTAACCGCTTGCCTGATCATT
MaU6b-400	CAGCCCGGGGGATCCACTAGTACTCAACCATGATTACCAATGATT	GGCGGCCGCTCTAGAACTAGTAACCGCTTGCCTGATCATT
MaU6b-300	CAGCCCGGGGGATCCACTAGTAGCACAAAAACGCAAAAGTCTA	GGCGGCCGCTCTAGAACTAGTAACCGCTTGCCTGATCATT
MaU6c-1000	CAGCCCGGGGGATCCACTAGTTATTTGTTGCCTTGGGTTGTG	GGCGGCCGCTCTAGAACTAGTAACAGCGTTACCGATCGACG
MaU6c-700	CAGCCCGGGGGATCCACTAGTAATTGGCACATTCTTTTGGTATCTT	GGCGGCCGCTCTAGAACTAGTAACAGCGTTACCGATCGACG
MaU6c-400	CAGCCCGGGGGATCCACTAGTGCCAATATATGACTATGCTGTTTCT	GGCGGCCGCTCTAGAACTAGTAACAGCGTTACCGATCGACG
MaU6c-300	CAGCCCGGGGGATCCACTAGTAAGCTGGTAGATGATTCGAGAAT	GGCGGCCGCTCTAGAACTAGTAACAGCGTTACCGATCGACG
pUbi	GCTATGACTGATTACGAATTCGTCGTGCCCCTCTCTAGAGA	TTTTTTCGGTGCCATGAATTCCTGCAGAAGTAACACCAAACAACA
MaU6c-T1	GATCGGGAGCACCGGTAAGGCGCGCCAATTGGCACATTCTTTTGGTATCTT	TGGACCATTGCAGAAAGATGCAACAGCGTTACCGATCGACG
MaU6c-T2	GATCGGGAGCACCGGTAAGGCGCGCCAATTGGCACATTCTTTTGGTATCTT	GACCGAGTCAATGATGAAGTCAACAGCGTTACCGATCGACG
gRNA-T1	GCATCTTTCTGCAATGGTCCAGTTTTAGAGCTAGAAATAGCAAGT	TCCCCGGGTACCCACTACGGCGCGCCAAAAAAAGCACCGACTCG
gRNA-T2	GACTTCATCATTGACTCGGTCGTTTTAGAGCTAGAAATAGCAAGT	TCCCCGGGTACCCACTACGGCGCGCCAAAAAAAGCACCGACTCG
OsU6a-T1	GATCGGGAGCACCGGTAAGGCGCGCCTTTTTTCCTGTAGTTTTCCCACAACC	TGGACCATTGCAGAAAGATGCGGCAGCCAAGCCAGC
OsU6a-T2	GATCGGGAGCACCGGTAAGGCGCGCCTTTTTTCCTGTAGTTTTCCCACAACC	GACCGAGTCAATGATGAAGTCGGCAGCCAAGCCAGC
MaPDST1-1st	TAAGAATATAGAGGCCAGCATGAACATTATCGG	TCACTCCATATACATGTTGGCATCTTTAGCA
Cas9-OsU6a-PDST1-2nd	CGATGTTGATTTATCACCGGGAAATAGTGGA	TGACCACTAAAGATATCAGAATGTCATACCTGCAC
Cas9-MaU6c-PDST1-2nd	ATCACGTGATTTATCACCGGGAAATAGTGGA	TTAGGCCTAAAGATATCAGAATGTCATACCTGCAC
opCas9-MaU6c-PDST1-2nd	AGTCAATGATTTATCACCGGGAAATAGTGGA	AGTTCCCTAAAGATATCAGAATGTCATACCTGCAC
PDST1-CK	CACGATTGATTTATCACCGGGAAATAGTGGA	CACTCACTAAAGATATCAGAATGTCATACCTGCAC
LUC-PDS-T1	GTGGAGATCGAATTCCCATGGTGAGACTTTTCAACAAAGG	TATGTTTTTGGCGTCTTCGCCGTGGACCATTGCAGAAAGATGCATTGTCCTCTCCAAATGAAAT
LUC-PDS-T2	GTGGAGATCGAATTCCCATGGTGAGACTTTTCAACAAAGG	TATGTTTTTGGCGTCTTCAACTTCATCATTGACTCGGTCCGGCATTGTCCTCTCCAAATGAAAT
