# Supplementary material for: Increased mutation efficiency of CRISPR/Cas9 genome editing in banana by optimized construct
Source: PeerJ. 2022 Jan 5;10:e12664. doi: 10.7717/peerj.12664 (PMC8742547; doi:10.7717/peerj.12664)
Supplement: Supplemental Information 5 — Preliminary activity analysis of U6 promoter [file peerj-10-12664-s005.xlsx]

## Sheet: Sheet1
										Preliminary activity analysis of U6 promoter
1	LUC	REN	LUC/REN		1	LUC	REN	LUC/REN		2		LUC	REN	LUC/REN		3	LUC	REN	LUC/REN		4	LUC	REN	LUC/REN
0800-CK-1	25	94119	0.000265621		OsU6a-1	254	223469	0.00113662		MaU6a-1		378	237640	0.00159064		MaU6b-1	198	103764	0.00190818		MaU6c-1	454	181458	0.00250196
0800-CK-2	34	114677	0.000296485		OsU6a-2	264	224794	0.00117441		MaU6a-2		384	256160	0.00149906		MaU6b-2	238	115616	0.00205854		MaU6c-2	503	205976	0.00244203
0800-CK-3	26	96966	0.000268135		OsU6a-3	250	223326	0.00111944		MaU6a-3		369	257790	0.0014314		MaU6b-3	229	115779	0.00197791		MaU6c-3	497	197629	0.00251481
		Mean value	0.000276747
Independent biological repeats		0800-CK-1	0.959798				OsU6a-1	4.10708					MaU6a-1	5.74763				MaU6b-1	6.89502				MaU6c-1	9.04059
		0800-CK-2	1.07132				OsU6a-2	4.24362					MaU6a-2	5.41673				MaU6b-2	7.43834				MaU6c-2	8.82406
		0800-CK-3	0.968882				OsU6a-3	4.04499					MaU6a-3	5.17222				MaU6b-3	7.14698				MaU6c-3	9.08704
		Mean value	1				Mean value	4.1319					Mean value	5.44553				Mean value	7.16011				Mean value	8.9839
		SD	0.0619323				SD	0.101611					SD	0.288785				SD	0.271898				SD	0.14036
											0800-ck	OsU6a	MaU6a	MaU6b	MaU6c
										Mean value	1	4.1319	5.44553	7.16011	8.9839
										SD	0.0619323	0.101611	0.288785	0.271898	0.14036
