# Supplementary material for: Increased mutation efficiency of CRISPR/Cas9 genome editing in banana by optimized construct
Source: PeerJ. 2022 Jan 5;10:e12664. doi: 10.7717/peerj.12664 (PMC8742547; doi:10.7717/peerj.12664)
Supplement: Supplemental Information 6 — U6 promoter activity analysis [file peerj-10-12664-s006.xlsx]

## Sheet: Sheet1
					U6 promoter activity analysis
	LUC	FLUC	LUC/FLUC			LUC	FLUC	LUC/FLUC			LUC	FLUC	LUC/FLUC			LUC	FLUC	LUC/FLUC
OSu6a-1	1671	1665935	0.00100304		Mau6a 300-1	3940	1651723	0.00238539		Mau6a 400-1	12096	4051241	0.00298575		Mau6a 700-1	2294	1610498	0.0014244
OSu6a-2	1718	1656303	0.00103725		Mau6a 300-2	3361	1651726	0.00203484		Mau6a 400-2	12104	4051237	0.00298773		Mau6a 700-2	2302	1610500	0.00142937
OSu6a-3	1285	1294135	0.000992941		Mau6a 300-3	2963	2228205	0.00132977		Mau6a 400-3	3749	2009220	0.0018659		Mau6a 700-3	2138	1444896	0.00147969
OSu6a-4	1259	1274902	0.000987527		Mau6a 300-4	2815	2164701	0.00130041		Mau6a 400-4	3522	1969793	0.00178801		Mau6a 700-4	1936	1390714	0.00139209
	LUC	FLUC	LUC/FLUC			LUC	FLUC	LUC/FLUC			LUC	FLUC	LUC/FLUC			LUC	FLUC	LUC/FLUC
Mau6a 1000-1	2140	1006721	0.00212571		Mau6b 300-1	10747	8723088	0.00123202		Mau6b 400-1	5484	2782772	0.0019707		Mau6b 700-1	4682	3484357	0.00134372
Mau6a 1000-2	2061	973604	0.00211688		Mau6b 300-2	15311	8575126	0.00178551		Mau6b 400-2	5040	2781217	0.00181216		Mau6b 700-2	4063	3562006	0.00114065
Mau6a 1000-3	6052	6121577	0.000988634		Mau6b 300-3	2287	2516143	0.000908931		Mau6b 400-3	5737	2695780	0.00212814		Mau6b 700-3	3922	4292648	0.000913655
Mau6a 1000-4	5967	6190195	0.000963944		Mau6b 300-4	2408	2432484	0.000989935		Mau6b 400-4	5698	2628247	0.00216798		Mau6b 700-4	3609	4186713	0.000862013
	LUC	FLUC	LUC/FLUC			LUC	FLUC	LUC/FLUC			LUC	FLUC	LUC/FLUC			LUC	FLUC	LUC/FLUC
Mau6b 1000-1	10369	9837169	0.00105406		Mau6c 300-1	14164	3971335	0.00356656		Mau6c 400-1	20494	4839715	0.00423455		Mau6c 700-1	12141	2668907	0.00454905
Mau6b 1000-2	9787	9567970	0.00102289		Mau6c 300-2	14299	3978130	0.0035944		Mau6c 400-2	20721	4849695	0.00427264		Mau6c 700-2	12030	2627876	0.00457784
Mau6b 1000-3	2735	2667956	0.00102513		Mau6c 300-3	11427	4170998	0.00273963		Mau6c 400-3	8115	2440851	0.00332466		Mau6c 700-3	15198	3524654	0.00431191
Mau6b 1000-4	2816	2680699	0.00105047		Mau6c 300-4	11812	4221228	0.00279824		Mau6c 400-4	8199	2517573	0.00325671		Mau6c 700-4	15340	3525833	0.00435074
	LUC	FLUC	LUC/FLUC
Mau6c 1000-1	27234	9069329	0.00300287
Mau6c 1000-2	26709	8934871	0.0029893
Mau6c 1000-3	9083	3681371	0.00246729
Mau6c 1000-4	9051	3671652	0.0024651
	OSu6a	Mau6a 300	Mau6a 400	Mau6a 700	Mau6a1000	Mau6b300	Mau6b400	Mau6b700	Mau6b1000	Mau6c300	Mau6c400	Mau6c700	Mau6c1000
Independent biological repeats	0.00100304	0.00238539	0.00298575	0.0014244	0.00212571	0.00123202	0.0019707	0.00134372	0.00105406	0.00356656	0.00423455	0.00454905	0.00300287
	0.00103725	0.00203484	0.00298773	0.00142937	0.00211688	0.00178551	0.00181216	0.00114065	0.00102289	0.0035944	0.00427264	0.00457784	0.0029893
	0.000992941	0.00132977	0.0018659	0.00147969	0.000988634	0.000908931	0.00212814	0.000913655	0.00102513	0.00273963	0.00332466	0.00431191	0.00246729
	0.000987527	0.00130041	0.00178801	0.00139209	0.000963944	0.000989935	0.00216798	0.000862013	0.00105047	0.00279824	0.00325671	0.00435074	0.0024651
Mean value	0.00100519
	OSu6a	Mau6a 300	Mau6a 400	Mau6a 700	Mau6a1000	Mau6b300	Mau6b400	Mau6b700	Mau6b1000	Mau6c300	Mau6c400	Mau6c700	Mau6c1000
	0.997862	2.37307	2.97034	1.41705	2.11474	1.22566	1.96052	1.33678	1.04862	3.54815	4.21268	4.52557	2.98737
	1.03189	2.02434	2.9723	1.42199	2.10595	1.77629	1.8028	1.13476	1.01761	3.57585	4.25058	4.55421	2.97387
	0.987815	1.3229	1.85626	1.47205	0.98353	0.904238	2.11715	0.908938	1.01984	2.72549	3.3075	4.28965	2.45455
	0.982429	1.2937	1.77877	1.3849	0.958967	0.984824	2.15679	0.857562	1.04505	2.78379	3.23989	4.32828	2.45238
Mean value	1	1.7535	2.39442	1.424	1.5408	1.22275	2.00932	1.05951	1.03278	3.15832	3.75266	4.42443	2.71704
SD	0.0222042	0.533558	0.666899	0.0360086	0.657743	0.39348	0.161666	0.220603	0.0163208	0.466871	0.55397	0.13476	0.304403
