# Supplementary material for: Increased mutation efficiency of CRISPR/Cas9 genome editing in banana by optimized construct
Source: PeerJ. 2022 Jan 5;10:e12664. doi: 10.7717/peerj.12664 (PMC8742547; doi:10.7717/peerj.12664)
Supplement: Supplemental Information 7 [file peerj-10-12664-s007.xlsx]

## Sheet: Sheet1
			PDS-T1
	Reads					Reads					Reads
	Indel	Total	Mutation efficiency(%)			Indel	Total	Mutation efficiency(%)			Indel	Total	Mutation efficiency(%)
（Ubi::Cas9+ OsU6a::sgRNA）-1	31974	6938815	0.46		（Ubi::Cas9+ MaU6c::sgRNA）-1	49109	6938815	0.7		（Ubi::opCas9+ MaU6c::sgRNA）-1	201880	6938815	2.9
（Ubi::Cas9+ OsU6a::sgRNA）-2	20735	6938815	0.29		（Ubi::Cas9+ MaU6c::sgRNA）-2	55510	6938815	0.8		（Ubi::opCas9+ MaU6c::sgRNA）-2	83324	6938815	1.2
	Ubi::Cas9+ OsU6a::sgRNA	Ubi::Cas9+ MaU6c::sgRNA	Ubi::opCas9+ MaU6c::sgRNA
repetition1	0.46	0.7	2.9
repetition2	0.29	0.8	1.2
	repetition1				repetition2
