# Supplementary material for: Increased mutation efficiency of CRISPR/Cas9 genome editing in banana by optimized construct
Source: PeerJ. 2022 Jan 5;10:e12664. doi: 10.7717/peerj.12664 (PMC8742547; doi:10.7717/peerj.12664)
Supplement: Supplemental Information 8 [file peerj-10-12664-s008.xlsx]

## Sheet: Sheet1
						PDS-T1												PDS-T2
	1	LUC	FLUC	LUC/FLUC	SD	3	LUC	FLUC	LUC/FLUC	SD			1	LUC	FLUC	LUC/FLUC	SD	3	LUC	FLUC	LUC/FLUC	SD
	(LUC+Ubi::Cas9)-1	190	11508	0.0165103	0.00244031	(35S::ifLUC+Ubi::Cas9+OsU6a::sgRNA)-1	1894107	1337429	1.41623	0.106304			(LUC+Ubi::Cas9)-1	155	22094	0.00701548	0.00118293	(35S::ifLUC+Ubi::Cas9+OsU6a::sgRNA)-1	17094	318769	0.053625	0.00194139
	(LUC+Ubi::Cas9)-2	182	10177	0.0178835		(35S::ifLUC+Ubi::Cas9+OsU6a::sgRNA)-2	1872349	1314694	1.42417				(LUC+Ubi::Cas9)-2	169	22411	0.00754094		(35S::ifLUC+Ubi::Cas9+OsU6a::sgRNA)-2	17033	313779	0.0542834
	(LUC+Ubi::Cas9)-3	344	29166	0.0117946		(35S::ifLUC+Ubi::Cas9+OsU6a::sgRNA)-3	4029380	2386489	1.68841				(LUC+Ubi::Cas9)-3	100	16886	0.00592207		(35S::ifLUC+Ubi::Cas9+OsU6a::sgRNA)-3	11504	198351	0.0579982
	(LUC+Ubi::Cas9)-4	364	32389	0.0112384		(35S::ifLUC+Ubi::Cas9+OsU6a::sgRNA)-4	3916056	2353872	1.66367				(LUC+Ubi::Cas9)-4	107	16200	0.00660494		(35S::ifLUC+Ubi::Cas9+OsU6a::sgRNA)-4	11644	200040	0.0582084
	(LUC+Ubi::Cas9)-5	319	23058	0.0138347		(35S::ifLUC+Ubi::Cas9+OsU6a::sgRNA)-5	3192126	2029943	1.57252				(LUC+Ubi::Cas9)-5	177	19696	0.0089866		(35S::ifLUC+Ubi::Cas9+OsU6a::sgRNA)-5	14939	279461	0.0534565
	(LUC+Ubi::Cas9)-6	321	21947	0.0146261		(35S::ifLUC+Ubi::Cas9+OsU6a::sgRNA)-6	3181072	2015644	1.57819				(LUC+Ubi::Cas9)-6	181	19579	0.0092446		(35S::ifLUC+Ubi::Cas9+OsU6a::sgRNA)-6	14696	274338	0.053569
	(LUC+Ubi::Cas9)-7	204	18114	0.011262		(35S::ifLUC+Ubi::Cas9+OsU6a::sgRNA)-7	2011249	1379497	1.45796				(LUC+Ubi::Cas9)-7	167	19430	0.00859496		(35S::ifLUC+Ubi::Cas9+OsU6a::sgRNA)-7	43028	782881	0.0549611
	(LUC+Ubi::Cas9)-8	255	18388	0.0138677		(35S::ifLUC+Ubi::Cas9+OsU6a::sgRNA)-8	1948803	1319836	1.47655				(LUC+Ubi::Cas9)-8	154	19159	0.008038		(35S::ifLUC+Ubi::Cas9+OsU6a::sgRNA)-8	42089	753411	0.0558646
			Mean value	0.0138772				Mean value	1.53471						Mean value	0.00774345				Mean value	0.0552458
	2	LUC	FLUC	LUC/FLUC	SD	4	LUC	FLUC	LUC/FLUC	SD			2	LUC	FLUC	LUC/FLUC	SD	4	LUC	FLUC	LUC/FLUC	SD
	(35S::ifLUC+Ubi::Cas9)-1	2332048	1110880	2.09928	0.0445835	(35S::ifLUC+Ubi::Cas9+MaU6c::sgRNA)-1	2203423	1460121	1.50907	0.045727			(35S::ifLUC+Ubi::Cas9)-1	63737	991792	0.0642645	0.00237072	(35S::ifLUC+Ubi::Cas9+MaU6c::sgRNA)-1	10804	225576	0.0478952	0.00305812
	(35S::ifLUC+Ubi::Cas9)-2	2332128	1114392	2.09274		(35S::ifLUC+Ubi::Cas9+MaU6c::sgRNA)-2	2139400	1402183	1.52576				(35S::ifLUC+Ubi::Cas9)-2	63710	990295	0.0643344		(35S::ifLUC+Ubi::Cas9+MaU6c::sgRNA)-2	11072	238288	0.0464648
	(35S::ifLUC+Ubi::Cas9)-3	2885590	1436366	2.00895		(35S::ifLUC+Ubi::Cas9+MaU6c::sgRNA)-3	1449033	1032758	1.40307				(35S::ifLUC+Ubi::Cas9)-3	41099	657642	0.0624945		(35S::ifLUC+Ubi::Cas9+MaU6c::sgRNA)-3	9891	211929	0.0466713
	(35S::ifLUC+Ubi::Cas9)-4	2932055	1453159	2.01771		(35S::ifLUC+Ubi::Cas9+MaU6c::sgRNA)-4	1434509	1020399	1.40583				(35S::ifLUC+Ubi::Cas9)-4	40991	657258	0.0623667		(35S::ifLUC+Ubi::Cas9+MaU6c::sgRNA)-4	9001	191446	0.0470159
	(35S::ifLUC+Ubi::Cas9)-5	3283110	1541805	2.12939		(35S::ifLUC+Ubi::Cas9+MaU6c::sgRNA)-5	1830686	1283557	1.42626				(35S::ifLUC+Ubi::Cas9)-5	42589	731691	0.0582063		(35S::ifLUC+Ubi::Cas9+MaU6c::sgRNA)-5	9771	243887	0.0400636
	(35S::ifLUC+Ubi::Cas9)-6	3295038	1564079	2.1067		(35S::ifLUC+Ubi::Cas9+MaU6c::sgRNA)-6	1821768	1277986	1.4255				(35S::ifLUC+Ubi::Cas9)-6	42797	734818	0.0582416		(35S::ifLUC+Ubi::Cas9+MaU6c::sgRNA)-6	9937	247785	0.0401033
	(35S::ifLUC+Ubi::Cas9)-7	4570325	2226525	2.05267		(35S::ifLUC+Ubi::Cas9+MaU6c::sgRNA)-7	174763	119849	1.45819				(35S::ifLUC+Ubi::Cas9)-7	25562	418033	0.0611483		(35S::ifLUC+Ubi::Cas9+MaU6c::sgRNA)-7	6474	145165	0.0445975
	(35S::ifLUC+Ubi::Cas9)-8	4598892	2254820	2.03958		(35S::ifLUC+Ubi::Cas9+MaU6c::sgRNA)-8	185498	127412	1.45589				(35S::ifLUC+Ubi::Cas9)-8	25648	421014	0.0609196		(35S::ifLUC+Ubi::Cas9+MaU6c::sgRNA)-8	6553	144883	0.0452296
			Mean value	2.06838				Mean value	1.4512						Mean value	0.061497				Mean value	0.0447551
	5	reads indel	FLUC	LUC/FLUC	SD								5	LUC	FLUC	LUC/FLUC	SD
	(35S::ifLUC+Ubi::opCas9+MaU6c::sgRNA)-1	2744953	2282951	1.20237	0.079753								(35S::ifLUC+Ubi::opCas9+MaU6c::sgRNA)-1	6767	358349	0.0188838	0.00219299
	(35S::ifLUC+Ubi::opCas9+MaU6c::sgRNA)-2	2740647	2280171	1.20195									(35S::ifLUC+Ubi::opCas9+MaU6c::sgRNA)-2	6907	368365	0.0187504
	(35S::ifLUC+Ubi::opCas9+MaU6c::sgRNA)-3	1247717	1093165	1.14138									(35S::ifLUC+Ubi::opCas9+MaU6c::sgRNA)-3	6191	344533	0.0179693
	(35S::ifLUC+Ubi::opCas9+MaU6c::sgRNA)-4	1220446	1080174	1.12986									(35S::ifLUC+Ubi::opCas9+MaU6c::sgRNA)-4	6225	344398	0.018075
	(35S::ifLUC+Ubi::opCas9+MaU6c::sgRNA)-5	933968	897109	1.04109									(35S::ifLUC+Ubi::opCas9+MaU6c::sgRNA)-5	6484	380598	0.0170363
	(35S::ifLUC+Ubi::opCas9+MaU6c::sgRNA)-6	920582	879544	1.04666									(35S::ifLUC+Ubi::opCas9+MaU6c::sgRNA)-6	6360	380178	0.016729
	(35S::ifLUC+Ubi::opCas9+MaU6c::sgRNA)-7	1113059	1093591	1.0178									(35S::ifLUC+Ubi::opCas9+MaU6c::sgRNA)-7	7203	324220	0.0222164
	(35S::ifLUC+Ubi::opCas9+MaU6c::sgRNA)-8	1089274	1077790	1.01066									(35S::ifLUC+Ubi::opCas9+MaU6c::sgRNA)-8	7308	324665	0.0225094
			Mean value	1.09897											Mean value	0.0190212
		LUC+Ubi::Cas9	35S::ifLUC+Ubi::Cas9	35S::ifLUC+Ubi::Cas9+OsU6a::sgRNA	35S::ifLUC+Ubi::Cas9+MaU6c::sgRNA	35S::ifLUC+Ubi::opCas9+MaU6c::sgRNA	PDS-T1								LUC+Ubi::Cas9	35S::ifLUC+Ubi::Cas9	35S::ifLUC+Ubi::Cas9+OsU6a::sgRNA	35S::ifLUC+Ubi::Cas9+MaU6c::sgRNA	35S::ifLUC+Ubi::opCas9+MaU6c::sgRNA	PDS-T2
	LUC/FLUC	0.0138772	2.06838	1.53471	1.4512	1.09897								LUC/FLUC	0.00774345	0.061497	0.0552458	0.0447551	0.0190212
	SD	0.00244031	0.0445835	0.106304	0.045727	0.079753								SD	0.00118293	0.00237072	0.00194139	0.00305812	0.00219299
				(35S::ifLUC+Ubi::Cas9)	(35S::ifLUC+Ubi::opCas9+MaU6c::sgRNA)	PDS-T1		(35S::ifLUC+Ubi::Cas9)	(35S::ifLUC+Ubi::opCas9+MaU6c::sgRNA)	PDS-T2
			repetition1	2.09928	1.20237		repetition1	0.0642645	0.0188838
			repetition2	2.09274	1.20195		repetition2	0.0643344	0.0187504
			repetition3	2.00895	1.14138		repetition3	0.0624945	0.0179693
			repetition4	2.01771	1.12986		repetition4	0.0623667	0.018075
			repetition5	2.12939	1.04109		repetition5	0.0582063	0.0170363
			repetition6	2.1067	1.04666		repetition6	0.0582416	0.016729
			repetition7	2.05267	1.0178		repetition7	0.0611483	0.0222164
			repetition8	2.03958	1.01066		repetition8	0.0609196	0.0225094
			average	2.06838			average	0.061497
				35S::ifLUC+Ubi::Cas9	35S::ifLUC+Ubi::opCas9+MaU6c::sgRNA-T1	PDS-T1		35S::ifLUC+Ubi::Cas9	35S::ifLUC+Ubi::opCas9+MaU6c::sgRNA-T2	PDS-T2
			repetition1	1.01494	0.581311		repetition1	1.045	0.307069
			repetition2	1.01178	0.581107		repetition2	1.04614	0.3049
			repetition3	0.971269	0.551824		repetition3	1.01622	0.292197
			repetition4	0.975504	0.546254		repetition4	1.01414	0.293917
			repetition5	1.0295	0.503335		repetition5	0.94649	0.277027
			repetition6	1.01853	0.506029		repetition6	0.947065	0.27203
			repetition7	0.992407	0.492077		repetition7	0.99433	0.36126
			repetition8	0.986078	0.488622		repetition8	0.990611	0.366024
			average	1	0.53132		average	1	0.309303
			SD	0.0215548	0.0385582		SD	0.0385502	0.0356601
				35S::ifLUC+Ubi::Cas9	35S::ifLUC+Ubi::opCas9+MaU6c::sgRNA-T1	35S::ifLUC+Ubi::opCas9+MaU6c::sgRNA-T2
			average	1	0.53132	0.309303
			SD	0.0215548	0.0385582	0.0356601
