# Supplementary material for: Increased mutation efficiency of CRISPR/Cas9 genome editing in banana by optimized construct
Source: PeerJ. 2022 Jan 5;10:e12664. doi: 10.7717/peerj.12664 (PMC8742547; doi:10.7717/peerj.12664)
Supplement: Supplemental Information 9 [file peerj-10-12664-s009.xlsx]

## Sheet: Sheet1
						U6 promoter activity analysis
		LUC	REN	LUC/REN			LUC	REN	LUC/REN			LUC	REN	LUC/REN			LUC	REN	LUC/REN
	OSu6a-1	283	266983	0.00105999		Mau6a 300-1	358	213623	0.00167585		Mau6a 400-1	560	255125	0.002195		Mau6a 700-1	207	159340	0.00129911
	OSu6a-2	276	240132	0.00114937		Mau6a 300-2	345	211479	0.00163137		Mau6a 400-2	553	254022	0.00217698		Mau6a 700-2	203	159137	0.00127563
	OSu6a-3	291	268192	0.00108504		Mau6a 300-3	359	215369	0.00166691		Mau6a 400-3	549	253768	0.00216339		Mau6a 700-3	197	158797	0.00124058
		LUC	REN	LUC/REN			LUC	REN	LUC/REN			LUC	REN	LUC/REN			LUC	REN	LUC/REN
	Mau6a 1000-1	299	265794	0.00112493		Mau6b 300-1	263	266592	0.000986526		Mau6b 400-1	598	343623	0.00174028		Mau6b 700-1	368	317370	0.00115953
	Mau6a 1000-2	282	258679	0.00109015		Mau6b 300-2	259	264688	0.000978511		Mau6b 400-2	534	315479	0.00169266		Mau6b 700-2	356	289410	0.00123009
	Mau6a 1000-3	276	242322	0.00113898		Mau6b 300-3	280	263084	0.0010643		Mau6b 400-3	561	315369	0.00177887		Mau6b 700-3	339	283750	0.00119471
		LUC	REN	LUC/REN			LUC	REN	LUC/REN			LUC	REN	LUC/REN			LUC	REN	LUC/REN
	Mau6b 1000-1	230	292180	0.000787186		Mau6c 300-1	1237	419690	0.00294741		Mau6c 400-1	962	271164	0.00354767		Mau6c 700-1	1650	349424	0.00472206
	Mau6b 1000-2	253	311360	0.000812564		Mau6c 300-2	1287	426910	0.00301469		Mau6c 400-2	908	269975	0.00336327		Mau6c 700-2	1590	351139	0.00452812
	Mau6b 1000-3	249	310920	0.000800849		Mau6c 300-3	1273	421290	0.00302167		Mau6c 400-3	924	269921	0.00342322		Mau6c 700-3	1450	350068	0.00414205
		LUC	REN	LUC/REN			LUC	REN	LUC/REN
	Mau6c 1000-1	887	357250	0.00248286		0800-CK-1	25	94119	0.000265621
	Mau6c 1000-2	795	341530	0.00232776		0800-CK-2	34	114677	0.000296485
	Mau6c 1000-3	799	336540	0.00237416		0800-CK-3	26	96966	0.000268135
	0800-CK	OSu6a	Mau6a 300	Mau6a 400	Mau6a 700	Mau6a1000	Mau6b300	Mau6b400	Mau6b700	Mau6b1000	Mau6c300	Mau6c400	Mau6c700	Mau6c1000
Independent biological repeats	0.000265621	0.00105999	0.00167585	0.002195	0.00129911	0.00112493	0.000986526	0.00174028	0.00115953	0.000787186	0.00294741	0.00354767	0.00472206	0.00248286
	0.000296485	0.00114937	0.00163137	0.00217698	0.00127563	0.00109015	0.000978511	0.00169266	0.00123009	0.000812564	0.00301469	0.00336327	0.00452812	0.00232776
	0.000268135	0.00108504	0.00166691	0.00216339	0.00124058	0.00113898	0.0010643	0.00177887	0.00119471	0.000800849	0.00302167	0.00342322	0.00414205	0.00237416
Mean value		0.00109813
	0800-CK	OSu6a	Mau6a 300	Mau6a 400	Mau6a 700	Mau6a1000	Mau6b300	Mau6b400	Mau6b700	Mau6b1000	Mau6c300	Mau6c400	Mau6c700	Mau6c1000
	0.241884	0.965266	1.52609	1.99885	1.18301	1.0244	0.898365	1.58476	1.05591	0.716839	2.68402	3.23063	4.30007	2.26098
	0.26999	1.04665	1.48558	1.98243	1.16163	0.992733	0.891066	1.5414	1.12016	0.73995	2.74528	3.06272	4.12347	2.11974
	0.244173	0.988079	1.51794	1.97006	1.12971	1.0372	0.969188	1.6199	1.08795	0.729281	2.75164	3.11731	3.7719	2.16199
Mean value	0.252016	1	1.50987	1.98378	1.15812	1.01811	0.91954	1.58202	1.08801	0.72869	2.72698	3.13689	4.06515	2.1809
SD	0.0156079	0.0419833	0.0214262	0.0144395	0.0268234	0.0228894	0.0431511	0.039322	0.0321268	0.0115665	0.0373411	0.0856527	0.268873	0.0724912
